# Supplementary material for: Selection of reference genes for quantitative real-time PCR analysis in cucumber (Cucumis sativus L.), pumpkin (Cucurbita moschata Duch.) and cucumber–pumpkin grafted plants
Source: PeerJ. 2019 Apr 17;7:e6536. doi: 10.7717/peerj.6536 (PMC6475253; doi:10.7717/peerj.6536)
Supplement: Supplemental Information 1 — 1 Ct values of samples in Cos, Pos, Gos,GLgs, Ggs, GosALL, and All groups. All samples were performed with three biological and technical replicates. Cos: organs of cucumber; CL and CR were the abbreviation for leaf, stem, root of cucumber, recpectively.Pos: organs of pumpkin; PL and PR were the abbreviation for leaf, stem, root of cucumber, respectively.Gos: organs of cucumber/pumpkin grafted plants; GL, GGS, GPS, and GR were the abbreviation for leaf, stem of scion, stem of graft union, stem of rootstock, and root of grafted cucumber, respectively.Ggs: graft union of cucumber/pumpkin in healing process; samples were harvested at 0d, 1d, 3d, 6d, 9d, 15d after grafting.Ggvs: graft union samples of different varieties of cucumber–pumpkin grafted plants; XZ, XJ, XH, ZJ, ZH were the abbreviation for‘Xintaimici–Zhongguonangua No. 26’, ‘Xintaimici–Jinxinzhen No. 5’, ‘Xintaimici–Huofenghuang’, ‘Zhongnong No. 26–Jinxinzhen No. 5’, and‘Zhongnong No.26–Huofenghuang’ grafting combinations, respectively.All: all samples 2 Determination of the optimal number of references genes. Pairwise variation Vn/Vn+1 values calculated by geNorm software were used to determine the optimal number of reference genes. A cut-off of 0.15 (Vn value) is usually applied. [file peerj-07-6536-s011.xlsm]

## Sheet: instructions
1 Ct values of samples in Cos, Pos, Gos,GLgs, Ggs, GosALL, and All groups. All samples were performed with three biological and technical replicates.
Cos: organs of cucumber; CL，CS，and CR were the abbreviation for leaf, stem, root of cucumber, recpectively.
Pos: organs of pumpkin; PL，PS，and PR were the abbreviation for leaf, stem, root of cucumber, respectively.
Gos: organs of cucumber/pumpkin grafted plants; GL，GCS，GGS, GPS, and GR were the abbreviation for leaf, stem of scion, stem of graft union, stem of rootstock, and root of grafted cucumber, respectively.
GLgs: graft union of cucumber/pumpkin under low temperature stress; samples were harvested at 0h, 5h, 12h, 24h after low treatment.
Ggs: graft union of cucumber/pumpkin in healing process; samples were harvested at 0d, 1d, 3d, 6d, 9d, 15d after grafting.
Ggvs: graft union samples of different varieties of cucumber–pumpkin grafted plants; XZ, XJ, XH, ZJ, ZH were the abbreviation for‘Xintaimici–Zhongguonangua No. 26’, ‘Xintaimici–Jinxinzhen No. 5’, ‘Xintaimici–Huofenghuang’, ‘Zhongnong No. 26–Jinxinzhen No. 5’, and‘Zhongnong No.26–Huofenghuang’ grafting combinations, respectively.
GosAll: all grafted cucumber samples;
All: all samples
2 Determination of the optimal number of references genes. Pairwise variation Vn/Vn+1 values calculated by geNorm software were used to determine the optimal number of reference genes. A cut-off of 0.15 (Vn value) is usually applied.

## Sheet: original data
Cos
	ACT	CYP	CASA	TUA	TIP41	F-BOX	RPL36Aa	PP2A	UBC4	ARF	LEA26	40SRPS8
CL-1	21.52	18.78	23.41	21.64	21.39	27.11	18.92	24.17	21.86	23.18	21.47	21.08
CL-2	21.61	18.7	23.51	21.67	21.28	27.05	18.93	24.21	21.96	23.74	21.32	21.08
CL-3	21.65	18.73	23.42	21.67	21.44	27.26	19.21	24.23	21.95	22.42	21.56	21.17
CS-1	19.79	17.53	23.26	22.12	21.52	28.97	20	25.17	20.21	21.64	19.57	21.46
CS-2	20.12	17.49	23.39	22.22	21.32	28.88	20	24.16	20.29	21.83	19.52	21.32
CS-3	19.74	17.51	23.46	22.21	21.35	28.86	19.86	24.32	20.17	22.19	19.57	21.43
CR-1	20.16	18.36	23.38	21.07	21.17	27.78	19.01	23.95	20.32	21.85	20.22	20.91
CR-2	20.25	18.19	23.37	21.29	21.14	27.92	19.21	23.67	20.7	21.74	20.31	20.96
CR-3	20.29	18.21	23.34	21.2	21.07	28.3	19.78	23.76	20.62	21.71	20.53	20.85
Pos
	ACT	CYP	CASA	TUA	TIP41	F-BOX	RPL36Aa	PP2A	UBC4	ARF	LEA26	40SRPS8
PL-1	19.89	19.49	23.59	21.86	22.44	29.87	20.99	30.99	20.84	24.2	22.09	22.27
PL-2	19.82	19.56	23.64	22.02	22.64	29.04	21.19	30.81	20.88	24.18	22.58	22.46
PL-3	19.77	19.5	23.71	21.97	22.58	29.03	21.14	31.52	20.7	24.17	22.58	22.44
PS-1	20.56	20.02	24.9	20.47	22.47	28.85	22.8	31.71	20.44	23.32	21.39	23.76
PS-2	20.6	20.18	24.9	20.52	22.51	28.91	22.88	31.58	20.48	23.25	21.32	23.78
PS-3	20.6	20.19	24.95	20.55	22.53	29.06	22.85	31.51	20.56	23.21	21.45	23.6
PR-1	19.47	18.76	25.12	22.39	22.81	29.75	22.5	31.67	20.33	23.96	20.55	23.91
PR-2	19.42	18.93	24.99	22.32	22.81	29.29	22.51	31.52	20.46	23.88	20.58	23.75
PR-3	19.04	18.99	25.03	22.36	22.79	29.67	22.27	31.49	20.35	23.73	21.03	23.96
Gos
	ACT	CYP	CASA	TUA	TIP41	F-BOX	RPL36Aa	PP2A	UBC4	ARF	LEA26	40SRPS8
GL-1	21.97	18.22	23.9	21.47	21.66	27.64	19.71	23.86	22.29	23.42	22.8	21.63
GL-2	22.16	18.14	23.91	21.33	21.43	27.54	19.74	23.49	22.03	23.26	22.89	21.64
GL-3	22.07	18.08	23.97	21.59	21.54	27.67	19.83	23.6	21.9	23.39	23.23	21.66
GCS-1	20.32	17.18	21.96	19.31	17.8	26.13	19.49	22.26	20.84	21.72	21.58	21.1
GCS-2	19.57	18.05	22.09	19.28	18.66	26.27	19.56	22.08	20.78	21.66	21.59	20.92
GCS-3	19.43	18.32	22.17	19.32	19.26	26.37	20.56	22.31	20.76	21.67	21.75	21.01
GGS-1	20.57	18.67	23.64	21.1	21.78	27.67	20.6	24.28	21.59	23.41	22.01	22.12
GGS-2	20.72	18.87	23.72	20.98	21.49	27.82	20.44	24.15	21.59	23.29	22	22.17
GGS-3	20.55	18.83	23.73	21.06	21.67	27.67	20.51	24.63	21.67	23.22	22.02	22.2
GPS-1	18.9	18.6	23.61	20.26	20.93	29.49	20.49	28.46	20.11	23.36	20.68	22.14
GPS-2	18.93	18.68	23.57	20.42	20.81	29.47	20.61	28.69	20.11	23.3	20.85	22.28
GPS-3	19.22	18.68	23.69	20.45	20.77	29.16	20.56	29.35	20.23	23.29	20.72	22.32
GR-1	19.89	18.86	23.87	21.43	22.37	29.78	20.98	29.64	20.42	22.95	21.2	22.34
GR-2	19.85	18.85	23.74	22	22.49	29.73	20.78	29.41	20.46	22.98	21.22	22.46
GR-3	20.21	18.8	23.41	22.32	22.53	29.62	21.07	29.6	20.51	22.98	21.38	22.41
Glgs
	ACT	CYP	CASA	TUA	TIP41	F-BOX	RPL36Aa	PP2A	UBC4	ARF	LEA26	40SRPS8
0h-1	18.21	17.4	23.2	20.8	20.34	26.57	19.56	23.33	18.76	22.64	21.25	21.26
0h-2	18.45	17.59	23.12	21.02	20.54	26.72	19.68	22.11	19.13	22.86	21.2	21.39
0h-3	18.97	17.54	23.04	20.82	20.05	26.67	19.68	22.92	19.29	22.97	21.16	21.33
5h-1	18.61	18.34	22.71	20.76	19.38	25.7	19.94	22.15	19.67	21.74	20.99	21.51
5h-2	18.68	18.16	22.71	20.72	19.87	25.94	19.96	22.61	19.97	21.86	20.09	21.55
5h-3	18.63	18.1	22.54	20.6	18.75	25.77	19.96	22.71	19.42	21.9	21.11	21.52
12h-1	18.28	17.34	22.81	20.88	19.99	25.83	19.68	23.05	18.76	21.82	20.76	20.97
12h-2	17.61	17.44	22.83	21.01	20.08	25.98	19.7	22.77	18.95	21.81	20.94	21.09
12h-3	17.69	17.52	22.25	20.79	20.47	26.09	19.69	23.11	19.03	21.83	20.82	21.1
24h-1	17.94	17.5	22.56	20.59	20.4	26.26	19.73	23.42	18.57	21.94	20.67	21.25
24h-2	18.27	17.4	22.73	20.68	20.42	26.07	20	23.46	18.55	22.09	19.63	20.4
24h-3	18.13	17.54	22.75	20.77	20.42	25.92	19.89	23.35	18.71	22.11	19.65	20.61
Ggs
	ACT	CYP	CASA	TUA	TIP41	F-BOX	RPL36Aa	PP2A	UBC4	ARF	LEA26	40SRPS8
0d-1	18.26	17.36	21.66	19.39	19.9	25.3	20.79	22.29	19.46	20.43	19.66	20.12
0d-2	18.07	17.22	21.63	19.43	19.84	26.23	20.67	22.16	19.45	20.36	19.59	20.04
0d-3	18.13	17.41	21.83	19.31	19.87	25.38	21.04	22.5	19.32	20.6	19.87	19.95
1d-1	18.26	18.01	22.3	19.56	20.69	25.86	21.9	23.4	19.6	21.1	19.97	20.48
1d-2	17.7	18.01	22.3	19.58	20.77	25.81	21.59	23.29	19.65	20.97	19.94	20.54
1d-3	17.69	18.15	22.3	19.58	20.71	25.93	21.69	23.35	19.69	21.05	20	20.6
3d-1	17.79	19.48	23.63	21.4	20.69	26.33	21.92	25	19.78	20.83	20.79	21.21
3d-2	17.18	19.73	23.44	21.56	20.82	26.31	21.95	24.97	19.75	20.89	20.79	21.24
3d-3	17.57	19.75	23.46	21.4	20.79	26.29	21.9	24.99	19.77	20.81	20.74	21.05
6d-1	18.77	18.13	23.61	20.5	20.56	26.47	21.75	25.32	20.54	21.41	20.84	20.63
6d-2	18.6	18.08	23.88	20.56	20.59	26.57	21.77	25.28	20.43	21.52	20.96	20.84
6d-3	18.7	18.09	23.68	20.6	20.62	26.54	21.4	25.35	20.55	21.48	20.9	20.27
9d-1	17.89	16.98	23.35	20.61	20.79	26.51	21.96	24.75	20.61	21.41	20.8	21.18
9d-2	18.86	17	23.29	20.43	20.91	26.41	22.4	25	20.64	21.37	20.94	20.96
9d-3	18.33	17.39	23.39	20.53	21.01	26.4	22.09	24.82	20.6	21.32	20.82	20.86
15d-1	18.54	17.56	22.64	19.48	20.44	25.84	21.35	23.85	19.74	21.07	20.4	20.25
15d-2	18.5	17.51	22.58	19.47	20.1	25.91	21.58	23.83	19.65	21.01	20.47	20.27
15d-3	18.63	17.61	22.7	19.5	20.3	25.94	21.21	23.86	19.83	21.17	20.52	20.21
Ggvs1
	ACT	CYP	CASA	TUA	TIP41	F-BOX	RPL36Aa	PP2A	UBC4	ARF	LEA26	40SRPS8
XZ-1	19.46	19.75	23.06	19.06	18.26	27	21.49	26.27	20.56	21.23	19.94	20.71
XZ-2	19.52	21.58	23.06	21.43	18.32	25.8	21.71	26.38	20.51	21.25	20.17	20.44
XZ-3	19.75	20.85	23.21	20.92	18.35	26.76	21.57	26.31	20.39	21.31	20.25	20.59
XJ-1	18.69	18.78	22.78	18.67	18.18	25.69	20.82	25.8	19.43	20.92	20.36	19.87
XJ-2	18.67	21.09	22.79	20.34	18.14	26.65	20.79	25.84	19.72	20.7	20.8	20.14
XJ-3	18.78	20.67	22.99	20.53	18.23	27.27	20.76	25.76	19.59	20.87	20.14	19.99
XH-1	19.04	19.13	22.81	19.35	18.39	27.08	21.47	25.82	20.07	21.24	20.13	20.75
XH-2	19.26	20.65	22.94	21.06	18.59	27.75	20.96	26.08	20.57	21.35	20.35	21.27
XH-3	19.13	20.42	22.9	20.78	18.43	28.06	20.92	25.85	20.49	21.23	20.31	20.94
ZJ-1	18.45	17.95	22.97	20.17	18.26	25.56	21.3	26.33	19.6	21.69	20.17	20.97
ZJ-2	18.52	20.13	23.06	21.2	18.79	25.87	21.29	26.71	19.79	21.74	20.57	20.93
ZJ-3	17.95	19.89	23.14	21.23	18.62	25.88	21.44	26.56	19.53	21.87	20.46	20.92
ZH-1	19.46	19.09	21.41	18.4	18.34	25.87	20.43	25.79	19.71	20.75	20.87	20.12
ZH-2	19.23	20.67	21.63	20.82	18.34	26.83	20.48	26	19.74	20.65	20.92	20.24
ZH-3	19.09	20.82	21.82	20.9	18.36	28.02	20.45	25.73	19.67	20.61	20.86	19.87
GoALL
	ACT	CYP	CASA	TUA	TIP41	F-BOX	RPL36Aa	PP2A	UBC4	ARF	LEA26	40SRPS8
GL-1	21.97	18.22	23.9	21.47	21.66	27.64	19.71	23.86	22.29	23.42	22.8	21.63
GL-2	22.16	18.14	23.91	21.33	21.43	27.54	19.74	23.49	22.03	23.26	22.89	21.64
GL-3	22.07	18.08	23.97	21.59	21.54	27.67	19.83	23.6	21.9	23.39	23.23	21.66
GCS-1	20.32	17.18	21.96	19.31	17.8	26.13	19.49	22.26	20.84	21.72	21.58	21.1
GCS-2	19.57	18.05	22.09	19.28	18.66	26.27	19.56	22.08	20.78	21.66	21.59	20.92
GCS-3	19.43	18.32	22.17	19.32	19.26	26.37	20.56	22.31	20.76	21.67	21.75	21.01
GGS-1	20.57	18.67	23.64	21.1	21.78	27.67	20.6	24.28	21.59	23.41	22.01	22.12
GGS-2	20.72	18.87	23.72	20.98	21.49	27.82	20.44	24.15	21.59	23.29	22	22.17
GGS-3	20.55	18.83	23.73	21.06	21.67	27.67	20.51	24.63	21.67	23.22	22.02	22.2
GPS-1	18.9	18.6	23.61	20.26	20.93	29.49	20.49	28.46	20.11	23.36	20.68	22.14
GPS-2	18.93	18.68	23.57	20.42	20.81	29.47	20.61	28.69	20.11	23.3	20.85	22.28
GPS-3	19.22	18.68	23.69	20.45	20.77	29.16	20.56	29.35	20.23	23.29	20.72	22.32
GR-1	19.89	18.86	23.87	21.43	22.37	29.78	20.98	29.64	20.42	22.95	21.2	22.34
GR-2	19.85	18.85	23.74	22	22.49	29.73	20.78	29.41	20.46	22.98	21.22	22.46
GR-3	20.21	18.8	23.41	22.32	22.53	29.62	21.07	29.6	20.51	22.98	21.38	22.41
0h-1	18.21	17.4	23.2	20.8	20.34	26.57	19.56	23.33	18.76	22.64	21.25	21.26
0h-2	18.45	17.59	23.12	21.02	20.54	26.72	19.68	22.11	19.13	22.86	21.2	21.39
0h-3	18.97	17.54	23.04	20.82	20.05	26.67	19.68	22.92	19.29	22.97	21.16	21.33
5h-1	18.61	18.34	22.71	20.76	19.38	25.7	19.94	22.15	19.67	21.74	20.99	21.51
5h-2	18.68	18.16	22.71	20.72	19.87	25.94	19.96	22.61	19.97	21.86	20.09	21.55
5h-3	18.63	18.1	22.54	20.6	18.75	25.77	19.96	22.71	19.42	21.9	21.11	21.52
12h-1	18.28	17.34	22.81	20.88	19.99	25.83	19.68	23.05	18.76	21.82	20.76	20.97
12h-2	17.61	17.44	22.83	21.01	20.08	25.98	19.7	22.77	18.95	21.81	20.94	21.09
12h-3	17.69	17.52	22.25	20.79	20.47	26.09	19.69	23.11	19.03	21.83	20.82	21.1
24h-1	17.94	17.5	22.56	20.59	20.4	26.26	19.73	23.42	18.57	21.94	20.67	21.25
24h-2	18.27	17.4	22.73	20.68	20.42	26.07	20	23.46	18.55	22.09	19.63	20.4
24h-3	18.13	17.54	22.75	20.77	20.42	25.92	19.89	23.35	18.71	22.11	19.65	20.61
0d-1	18.26	17.36	21.66	19.39	19.9	25.3	20.79	22.29	19.46	20.43	19.66	20.12
0d-2	18.07	17.22	21.63	19.43	19.84	26.23	20.67	22.16	19.45	20.36	19.59	20.04
0d-3	18.13	17.41	21.83	19.31	19.87	25.38	21.04	22.5	19.32	20.6	19.87	19.95
1d-1	18.26	18.01	22.3	19.56	20.69	25.86	21.9	23.4	19.6	21.1	19.97	20.48
1d-2	17.7	18.01	22.3	19.58	20.77	25.81	21.59	23.29	19.65	20.97	19.94	20.54
1d-3	17.69	18.15	22.3	19.58	20.71	25.93	21.69	23.35	19.69	21.05	20	20.6
3d-1	17.79	19.48	23.63	21.4	20.69	26.33	21.92	25	19.78	20.83	20.79	21.21
3d-2	17.18	19.73	23.44	21.56	20.82	26.31	21.95	24.97	19.75	20.89	20.79	21.24
3d-3	17.57	19.75	23.46	21.4	20.79	26.29	21.9	24.99	19.77	20.81	20.74	21.05
6d-1	18.77	18.13	23.61	20.5	20.56	26.47	21.75	25.32	20.54	21.41	20.84	20.63
6d-2	18.6	18.08	23.88	20.56	20.59	26.57	21.77	25.28	20.43	21.52	20.96	20.84
6d-3	18.7	18.09	23.68	20.6	20.62	26.54	21.4	25.35	20.55	21.48	20.9	20.27
9d-1	17.89	16.98	23.35	20.61	20.79	26.51	21.96	24.75	20.61	21.41	20.8	21.18
9d-2	18.86	17	23.29	20.43	20.91	26.41	22.4	25	20.64	21.37	20.94	20.96
9d-3	18.33	17.39	23.39	20.53	21.01	26.4	22.09	24.82	20.6	21.32	20.82	20.86
15d-1	18.54	17.56	22.64	19.48	20.44	25.84	21.35	23.85	19.74	21.07	20.4	20.25
15d-2	18.5	17.51	22.58	19.47	20.1	25.91	21.58	23.83	19.65	21.01	20.47	20.27
15d-3	18.63	17.61	22.7	19.5	20.3	25.94	21.21	23.86	19.83	21.17	20.52	20.21
XZ-1	19.46	19.75	23.06	19.06	18.26	27	21.49	26.27	20.56	21.23	19.94	20.71
XZ-2	19.52	21.58	23.06	21.43	18.32	25.8	21.71	26.38	20.51	21.25	20.17	20.44
XZ-3	19.75	20.85	23.21	20.92	18.35	26.76	21.57	26.31	20.39	21.31	20.25	20.59
XJ-1	18.69	18.78	22.78	18.67	18.18	25.69	20.82	25.8	19.43	20.92	20.36	19.87
XJ-2	18.67	21.09	22.79	20.34	18.14	26.65	20.79	25.84	19.72	20.7	20.8	20.14
XJ-3	18.78	20.67	22.99	20.53	18.23	27.27	20.76	25.76	19.59	20.87	20.14	19.99
XH-1	19.04	19.13	22.81	19.35	18.39	27.08	21.47	25.82	20.07	21.24	20.13	20.75
XH-2	19.26	20.65	22.94	21.06	18.59	27.75	20.96	26.08	20.57	21.35	20.35	21.27
XH-3	19.13	20.42	22.9	20.78	18.43	28.06	20.92	25.85	20.49	21.23	20.31	20.94
ZJ-1	18.45	17.95	22.97	20.17	18.26	25.56	21.3	26.33	19.6	21.69	20.17	20.97
ZJ-2	18.52	20.13	23.06	21.2	18.79	25.87	21.29	26.71	19.79	21.74	20.57	20.93
ZJ-3	17.95	19.89	23.14	21.23	18.62	25.88	21.44	26.56	19.53	21.87	20.46	20.92
ZH-1	19.46	19.09	21.41	18.4	18.34	25.87	20.43	25.79	19.71	20.75	20.87	20.12
ZH-2	19.23	20.67	21.63	20.82	18.34	26.83	20.48	26	19.74	20.65	20.92	20.24
ZH-3	19.09	20.82	21.82	20.9	18.36	28.02	20.45	25.73	19.67	20.61	20.86	19.87
ALL
	ACT	CYP	CASA	TUA	TIP41	F-BOX	RPL36Aa	PP2A	UBC4	ARF	LEA26	40SRPS8
CL-1	21.52	18.78	23.41	21.64	21.39	27.11	18.92	24.17	21.86	23.18	21.47	21.08
CL-2	21.61	18.7	23.51	21.67	21.28	27.05	18.93	24.21	21.96	23.74	21.32	21.08
CL-3	21.65	18.73	23.42	21.67	21.44	27.26	19.21	24.23	21.95	22.42	21.56	21.17
CS-1	19.79	17.53	23.26	22.12	21.52	28.97	20	25.17	20.21	21.64	19.57	21.46
CS-2	20.12	17.49	23.39	22.22	21.32	28.88	20	24.16	20.29	21.83	19.52	21.32
CS-3	19.74	17.51	23.46	22.21	21.35	28.86	19.86	24.32	20.17	22.19	19.57	21.43
CR-1	20.16	18.36	23.38	21.07	21.17	27.78	19.01	23.95	20.32	21.85	20.22	20.91
CR-2	20.25	18.19	23.37	21.29	21.14	27.92	19.21	23.67	20.7	21.74	20.31	20.96
CR-3	20.29	18.21	23.34	21.2	21.07	28.3	19.78	23.76	20.62	21.71	20.53	20.85
PL-1	19.89	19.49	23.59	21.86	22.44	29.87	20.99	30.99	20.84	24.2	22.09	22.27
PL-2	19.82	19.56	23.64	22.02	22.64	29.04	21.19	30.81	20.88	24.18	22.58	22.46
PL-3	19.77	19.5	23.71	21.97	22.58	29.03	21.14	31.52	20.7	24.17	22.58	22.44
PS-1	20.56	20.02	24.9	20.47	22.47	28.85	22.8	31.71	20.44	23.32	21.39	23.76
PS-2	20.6	20.18	24.9	20.52	22.51	28.91	22.88	31.58	20.48	23.25	21.32	23.78
PS-3	20.6	20.19	24.95	20.55	22.53	29.06	22.85	31.51	20.56	23.21	21.45	23.6
PR-1	19.47	18.76	25.12	22.39	22.81	29.75	22.5	31.67	20.33	23.96	20.55	23.91
PR-2	19.42	18.93	24.99	22.32	22.81	29.29	22.51	31.52	20.46	23.88	20.58	23.75
PR-3	19.04	18.99	25.03	22.36	22.79	29.67	22.27	31.49	20.35	23.73	21.03	23.96
GL-1	21.97	18.22	23.9	21.47	21.66	27.64	19.71	23.86	22.29	23.42	22.8	21.63
GL-2	22.16	18.14	23.91	21.33	21.43	27.54	19.74	23.49	22.03	23.26	22.89	21.64
GL-3	22.07	18.08	23.97	21.59	21.54	27.67	19.83	23.6	21.9	23.39	23.23	21.66
GCS-1	20.32	17.18	21.96	19.31	17.8	26.13	19.49	22.26	20.84	21.72	21.58	21.1
GCS-2	19.57	18.05	22.09	19.28	18.66	26.27	19.56	22.08	20.78	21.66	21.59	20.92
GCS-3	19.43	18.32	22.17	19.32	19.26	26.37	20.56	22.31	20.76	21.67	21.75	21.01
GGS-1	20.57	18.67	23.64	21.1	21.78	27.67	20.6	24.28	21.59	23.41	22.01	22.12
GGS-2	20.72	18.87	23.72	20.98	21.49	27.82	20.44	24.15	21.59	23.29	22	22.17
GGS-3	20.55	18.83	23.73	21.06	21.67	27.67	20.51	24.63	21.67	23.22	22.02	22.2
GPS-1	18.9	18.6	23.61	20.26	20.93	29.49	20.49	28.46	20.11	23.36	20.68	22.14
GPS-2	18.93	18.68	23.57	20.42	20.81	29.47	20.61	28.69	20.11	23.3	20.85	22.28
GPS-3	19.22	18.68	23.69	20.45	20.77	29.16	20.56	29.35	20.23	23.29	20.72	22.32
GR-1	19.89	18.86	23.87	21.43	22.37	29.78	20.98	29.64	20.42	22.95	21.2	22.34
GR-2	19.85	18.85	23.74	22	22.49	29.73	20.78	29.41	20.46	22.98	21.22	22.46
GR-3	20.21	18.8	23.41	22.32	22.53	29.62	21.07	29.6	20.51	22.98	21.38	22.41
0h-1	18.21	17.4	23.2	20.8	20.34	26.57	19.56	23.33	18.76	22.64	21.25	21.26
0h-2	18.45	17.59	23.12	21.02	20.54	26.72	19.68	22.11	19.13	22.86	21.2	21.39
0h-3	18.97	17.54	23.04	20.82	20.05	26.67	19.68	22.92	19.29	22.97	21.16	21.33
5h-1	18.61	18.34	22.71	20.76	19.38	25.7	19.94	22.15	19.67	21.74	20.99	21.51
5h-2	18.68	18.16	22.71	20.72	19.87	25.94	19.96	22.61	19.97	21.86	20.09	21.55
5h-3	18.63	18.1	22.54	20.6	18.75	25.77	19.96	22.71	19.42	21.9	21.11	21.52
12h-1	18.28	17.34	22.81	20.88	19.99	25.83	19.68	23.05	18.76	21.82	20.76	20.97
12h-2	17.61	17.44	22.83	21.01	20.08	25.98	19.7	22.77	18.95	21.81	20.94	21.09
12h-3	17.69	17.52	22.25	20.79	20.47	26.09	19.69	23.11	19.03	21.83	20.82	21.1
24h-1	17.94	17.5	22.56	20.59	20.4	26.26	19.73	23.42	18.57	21.94	20.67	21.25
24h-2	18.27	17.4	22.73	20.68	20.42	26.07	20	23.46	18.55	22.09	19.63	20.4
24h-3	18.13	17.54	22.75	20.77	20.42	25.92	19.89	23.35	18.71	22.11	19.65	20.61
0d-1	18.26	17.36	21.66	19.39	19.9	25.3	20.79	22.29	19.46	20.43	19.66	20.12
0d-2	18.07	17.22	21.63	19.43	19.84	26.23	20.67	22.16	19.45	20.36	19.59	20.04
0d-3	18.13	17.41	21.83	19.31	19.87	25.38	21.04	22.5	19.32	20.6	19.87	19.95
1d-1	18.26	18.01	22.3	19.56	20.69	25.86	21.9	23.4	19.6	21.1	19.97	20.48
1d-2	17.7	18.01	22.3	19.58	20.77	25.81	21.59	23.29	19.65	20.97	19.94	20.54
1d-3	17.69	18.15	22.3	19.58	20.71	25.93	21.69	23.35	19.69	21.05	20	20.6
3d-1	17.79	19.48	23.63	21.4	20.69	26.33	21.92	25	19.78	20.83	20.79	21.21
3d-2	17.18	19.73	23.44	21.56	20.82	26.31	21.95	24.97	19.75	20.89	20.79	21.24
3d-3	17.57	19.75	23.46	21.4	20.79	26.29	21.9	24.99	19.77	20.81	20.74	21.05
6d-1	18.77	18.13	23.61	20.5	20.56	26.47	21.75	25.32	20.54	21.41	20.84	20.63
6d-2	18.6	18.08	23.88	20.56	20.59	26.57	21.77	25.28	20.43	21.52	20.96	20.84
6d-3	18.7	18.09	23.68	20.6	20.62	26.54	21.4	25.35	20.55	21.48	20.9	20.27
9d-1	17.89	16.98	23.35	20.61	20.79	26.51	21.96	24.75	20.61	21.41	20.8	21.18
9d-2	18.86	17	23.29	20.43	20.91	26.41	22.4	25	20.64	21.37	20.94	20.96
9d-3	18.33	17.39	23.39	20.53	21.01	26.4	22.09	24.82	20.6	21.32	20.82	20.86
15d-1	18.54	17.56	22.64	19.48	20.44	25.84	21.35	23.85	19.74	21.07	20.4	20.25
15d-2	18.5	17.51	22.58	19.47	20.1	25.91	21.58	23.83	19.65	21.01	20.47	20.27
15d-3	18.63	17.61	22.7	19.5	20.3	25.94	21.21	23.86	19.83	21.17	20.52	20.21
XZ-1	19.46	19.75	23.06	19.06	18.26	27	21.49	26.27	20.56	21.23	19.94	20.71
XZ-2	19.52	21.58	23.06	21.43	18.32	25.8	21.71	26.38	20.51	21.25	20.17	20.44
XZ-3	19.75	20.85	23.21	20.92	18.35	26.76	21.57	26.31	20.39	21.31	20.25	20.59
XJ-1	18.69	18.78	22.78	18.67	18.18	25.69	20.82	25.8	19.43	20.92	20.36	19.87
XJ-2	18.67	21.09	22.79	20.34	18.14	26.65	20.79	25.84	19.72	20.7	20.8	20.14
XJ-3	18.78	20.67	22.99	20.53	18.23	27.27	20.76	25.76	19.59	20.87	20.14	19.99
XH-1	19.04	19.13	22.81	19.35	18.39	27.08	21.47	25.82	20.07	21.24	20.13	20.75
XH-2	19.26	20.65	22.94	21.06	18.59	27.75	20.96	26.08	20.57	21.35	20.35	21.27
XH-3	19.13	20.42	22.9	20.78	18.43	28.06	20.92	25.85	20.49	21.23	20.31	20.94
ZJ-1	18.45	17.95	22.97	20.17	18.26	25.56	21.3	26.33	19.6	21.69	20.17	20.97
ZJ-2	18.52	20.13	23.06	21.2	18.79	25.87	21.29	26.71	19.79	21.74	20.57	20.93
ZJ-3	17.95	19.89	23.14	21.23	18.62	25.88	21.44	26.56	19.53	21.87	20.46	20.92
ZH-1	19.46	19.09	21.41	18.4	18.34	25.87	20.43	25.79	19.71	20.75	20.87	20.12
ZH-2	19.23	20.67	21.63	20.82	18.34	26.83	20.48	26	19.74	20.65	20.92	20.24
ZH-3	19.09	20.82	21.82	20.9	18.36	28.02	20.45	25.73	19.67	20.61	20.86	19.87
Determination of the optimal number of references genes. Pairwise variation Vn/Vn+1 values calculated by geNorm software were used to determine the optimal number of reference genes. A cut-off of 0.15 (Vn value) is usually applied.
	V2/3	V3/4	V4/5	V5/6	V6/7	V7/8	V8/9	V9/10	V10/11	V11/12
Cos	0.0742315	0.0521425	0.0676348	0.0520188	0.0396612	0.0440995	0.0440536	0.0391614	0.0396022	0.0390561
Pos	0.0563749	0.0413698	0.0492948	0.0402874	0.0313987	0.0488047	0.0391415	0.0361366	0.0355462	0.0362326
Gos	0.0768905	0.0690362	0.0524557	0.0712909	0.0526754	0.0470214	0.0631766	0.0543324	0.0588665	0.194733
GLgs	0.0360583	0.025137	0.0333057	0.0263477	0.0281266	0.0219963	0.0194568	0.0187182	0.0191709	0.0234023
Ggs	0.0359179	0.0256345	0.0212394	0.0200002	0.0181666	0.0266892	0.0373956	0.0424092	0.0456773	0.0465826
Ggvs	0.0258237	0.029246	0.0277173	0.0224672	0.0196025	0.0282437	0.0341512	0.0496813	0.0423311	0.0400114
GoAll	0.0616194	0.0490863	0.0513158	0.0368391	0.0399181	0.0495797	0.0478132	0.0433029	0.0431176	0.0952561
All	0.0468534	0.0661594	0.0507369	0.0467339	0.0385862	0.0317793	0.0279327	0.0486686	0.0471763	0.153384
