# Supplementary material for: Selection of reference genes for quantitative real-time PCR analysis in cucumber (Cucumis sativus L.), pumpkin (Cucurbita moschata Duch.) and cucumber–pumpkin grafted plants
Source: PeerJ. 2019 Apr 17;7:e6536. doi: 10.7717/peerj.6536 (PMC6475253; doi:10.7717/peerj.6536)
Supplement: Table S2 — This is raw data from the transcriptomes data. [file peerj-07-6536-s002.xls]

## Sheet: Sheet1
Table S2 RPKM values of the 10 cucumber genes and 7 pumpking genes covering transcriptomes data of graft union at the 0d (ck-m), 3d, 6d, 9d after grafting
Gene name	Gene number	ck-m-1	ck-m-2	ck-m-3	3d-1	3d-2	3d-3	6d-1	6d-2	6d-3	9d-1	9d-2	9d-3	CV
csaUBC	Csa3G358610	413.442	427.751	434.834	479.865	422.687	697.301	501.168	439.791	435.011	521.86	530.346	483.135	0.163066
csaARF	Csa5G524710	309.345	387.54	299.948	356.567	418.999	362.894	435.038	404.288	444.784	330.799	461.12	313.722	0.149434
csaLEA26	Csa2G151040	419.024	338.263	389.19	482.004	352.115	354.885	349.086	351.971	372.538	297.322	383.228	334.807	0.12752
csa40SRPS8	Csa6G382970	306.621	326.82	303.681	371.627	384.095	391.24	362.16	416.558	385.413	270.495	392.572	352.749	0.124495
	Csa2G059750	417.448	469.215	442.736	397.413	519.904	387.051	367.379	459.132	360.326	390.617	358.264	339.329	0.132122
	Csa2G097440	387.307	312.877	338.886	248.027	358.832	264.284	404.357	433.616	431.732	426.353	399.481	382.682	0.172413
	Csa5G139640	353.304	341.493	328.721	205.96	231.989	242.254	346.65	308.572	308.855	297.381	220.727	310.085	0.179289
	Csa5G466870	453.774	540.917	435.152	342.547	549.192	441.958	446.931	444.696	427.948	433.85	484.766	409.934	0.122439
	Csa5G601490	338.412	318.194	311.586	274.685	353.213	318.508	379.344	371.839	306.361	474.532	385.049	363.586	0.14802
	Csa6G382970	371.627	384.095	391.24	270.495	392.572	352.749	306.621	326.82	303.681	365.957	327.189	302.089	0.119162
cmoUBC	CmoCh16G000840	350.536	333.843	344.109	321.682	374.791	354.006	348.341	305.429	400.577	356.676	357.197	319.16	0.0738361
cmoLEA26	CmoCh04G020870	387.267	242.519	266.196	295.789	364.472	292.049	425.965	381.578	372.775	367.743	457.383	428.118	0.191102
cmoARF	CmoCh05G000180	418.953	335.708	320.922	358.876	434.41	371.147	430.828	393.677	387.693	409.629	442.974	425.041	0.101921
cmo40SRPS8	CmoCh15G006760	380.648	289.148	291.551	297.693	324.353	321.204	287.619	178.193	232.205	228.866	317.133	232.227	0.195209
	CmoCh04G023270	432.702	334.867	282.279	406.086	455.795	350.652	373.955	267.382	306.072	295.855	378.32	346.673	0.16887
	CmoCh04G026270	546.289	468.036	375.06	353.996	387.715	378.65	462.223	422.157	380.178	421.635	489.005	457.021	0.133557
	CmoCh01G005230	212.397	148.2	156.355	192.78	190.285	194.498	209.183	166.405	163.564	143.06	217.879	173.721	0.141969
Note: Coefficient of variation (CV) was calculated for every gene. These data from our research on the transcriptome analysis about graft union healing, but not published now.
