# Supplementary material for: Selection of reference genes for quantitative real-time PCR analysis in cucumber (Cucumis sativus L.), pumpkin (Cucurbita moschata Duch.) and cucumber–pumpkin grafted plants
Source: PeerJ. 2019 Apr 17;7:e6536. doi: 10.7717/peerj.6536 (PMC6475253; doi:10.7717/peerj.6536)
Supplement: Table S3 — This is raw data from the transcriptomes data. [file peerj-07-6536-s003.xlsx]

## Sheet: Sheet1
Table S3 RPKM values of the csaCYCD3;1, csaRUL, cmoRUL, cmoPIN genes, and the commonly used refenence genes covering transcriptomes data of graft union at the 0d (ck-m), 3d, 6d, 9d after grafting.
Gene name	Gene ID	CK-M-1	CK-M-2	CK-M-3	3d-1	3d-2	3d-3	6d-1	6d-2	6d-3	9d-1	9d-2	9d-3
csaCYCD3；1	Csa2G356610	58.5456	27.7924	59.6426	244.606	270.92	285.125	340.422	355.191	336.406	210.784	361.877	312.049
cmoPIN	CmoCh15G009810	286.072	215.435	267.38	56.1805	50.1175	46.4435	35.9808	26.3259	37.7005	50.9716	23.2786	41.6975
csaRUL	Csa3G895630	38.6388	45.0258	42.6147	106.48	78.8424	110.669	99.5448	108.371	87.2961	69.6985	114.506	83.497
cmoRUL	CmoCh15G013320	534.058	454.621	383.789	1262.35	1292.72	1134.86	1460.54	1399.67	1461.83	980.793	986.113	1025.87
csaACT	Csa6G484600	800.896	738.561	788.683	586.993	453.541	557.715	599.788	617.814	545.252	459.844	647.805	545.801
csaCYP	Csa7G009740	3646.77	3219.91	3324.48	2888.31	2815.91	2142.03	3303.14	3766.53	3063.78	1651.36	2882.21	2157.37
csaCACS	Csa3G902930	95.7473	88.0425	76.2975	73.8401	53.9536	61.0029	85.8208	76.2977	81.2457	64.4304	92.8544	72.7884
csaTUA	Csa4G000580	528.594	571.183	392.809	2480.23	2276.68	2251.36	874.53	1115.97	1557.03	1283.02	1693.1	1773.37
csaTIP41	Csa7G071610	55.705	47.3945	40.2134	47.2495	38.3417	43.4719	48.4211	41.0075	62.1583	30.6166	39.6898	39.3088
csaF-Box	Csa5G642160	4.97216	0.708501	0	7.70923	0.615949	11.2695	1.13589	4.4647	9.41568	3.07826	1.35164	5.12859
csaPRL36Aa	Csa3G653380	229.866	169.772	253.704	291.188	394.111	258.987	246.663	207.422	261.479	175.386	138.682	183.085
csaPP2A	Csa5G608520	225.339	171.332	186.06	211.5	96.9267	144.172	139.681	141.197	174.793	135.871	167.218	146.325
cmoACT	CmoCh07G008070	0.524243	0.19817	0	1.02456	0.200861	0	7.65674	3.14091	4.9295	1.8477	5.24169	2.23331
cmoCYP	CmoCh19G007340	0	0	0	0	0	0	0	0	0	0	0	0
cmoCACS	CmoCh02G016480	2.66226	2.7186	0.567255	3.81308	0.768631	2.64779	5.74434	2.11695	0.812448	2.17245	3.48153	4.15891
cmoTUA	CmoCh16G003240	690.135	532.045	540.306	631.777	234.688	268.375	729.453	498.632	570.382	564.637	691.367	711.417
cmoTIP41	CmoCh11G013980	34.8574	57.3152	36.7777	57.5343	43.105	56.8829	49.4337	46.834	56.4284	44.7133	49.2279	38.2472
cmoF-Box	CmoCh15G002280	4.7763	5.82455	6.15462	5.67083	3.45997	6.86207	8.22657	5.01919	4.39718	5.47184	7.49821	10.8779
cmoPRL36Aa	CmoCh01G002600	88.5473	73.1706	78.477	155.725	170.14	86.8463	110.927	108.003	151.649	122.516	86.2797	115.891
cmoPP2A	CmoCh18G010470	127.506	133.982	136.897	202.392	133.795	159.317	116.932	111.497	127.874	116.696	125.24	125.177
