# Supplementary material for: Selection of reference genes for quantitative real-time PCR analysis in cucumber (Cucumis sativus L.), pumpkin (Cucurbita moschata Duch.) and cucumber–pumpkin grafted plants
Source: PeerJ. 2019 Apr 17;7:e6536. doi: 10.7717/peerj.6536 (PMC6475253; doi:10.7717/peerj.6536)
Supplement: Table S5 [file peerj-07-6536-s005.xlsx]

## Sheet: GO number for reference gene
Gen name	Gene ID	Category	Term Accession	Term Name
csaACT	Csa6G484600	biological_process	GO:0008152	metabolic process
		biological_process	GO:0008150	biological_process
		cellular_component	GO:0005575	cellular_component
		molecular_function	GO:0005524	ATP binding
		molecular_function	GO:0004386	helicase activity
		molecular_function	GO:0003674	molecular_function
		molecular_function	GO:0009055	electron carrier activity
		molecular_function	GO:0005509	calcium ion binding
csaCYP	Csa7G009740	biological_process	GO:0006457	protein folding
		biological_process	GO:0000413	protein peptidyl-prolyl isomerization
		cellular_component	GO:0005737	cytoplasm
		cellular_component	GO:0005575	cellular_component
		molecular_function	GO:0042277	peptide binding
		molecular_function	GO:0003755	peptidyl-prolyl cis-trans isomerase activity
csaCACS	Csa3G902930	biological_process	GO:0009058	biosynthetic process
		biological_process	GO:0006897	endocytosis
		biological_process	GO:0006886	intracellular protein transport
		biological_process	GO:0016192	vesicle-mediated transport
		biological_process	GO:0006810	transport
		cellular_component	GO:0030131	clathrin adaptor complex
		cellular_component	GO:0005829	cytosol
		cellular_component	GO:0005886	plasma membrane
		molecular_function	GO:0003824	catalytic activity
		molecular_function	GO:0030170	pyridoxal phosphate binding
		molecular_function	GO:0003674	molecular_function
		molecular_function	GO:0009055	electron carrier activity
		molecular_function	GO:0051536	iron-sulfur cluster binding
csaTUA	Csa4G000580	biological_process	GO:0008152	metabolic process
		biological_process	GO:0007017	microtubule-based process
		biological_process	GO:0051258	protein polymerization
		biological_process	GO:0007010	cytoskeleton organization
		cellular_component	GO:0005737	cytoplasm
		cellular_component	GO:0005874	microtubule
		molecular_function	GO:0003924	GTPase activity
		molecular_function	GO:0005525	GTP binding
		molecular_function	GO:0005200	structural constituent of cytoskeleton
csaTIP41	Csa7G071610	biological_process	GO:0008150	biological_process
		cellular_component	GO:0005575	cellular_component
		cellular_component	GO:0005829	cytosol
		molecular_function	GO:0003674	molecular_function
csaF-BOX	Csa5G642160	biological_process	GO:0008152	metabolic process
		biological_process	GO:0008150	biological_process
		cellular_component	GO:0005575	cellular_component
		molecular_function	GO:0016874	ligase activity
		molecular_function	GO:0005515	protein binding
		molecular_function	GO:0003674	molecular_function
csaPRL36Aa	Csa3G653380	biological_process	GO:0042254	ribosome biogenesis
		biological_process	GO:0006412	translation
		biological_process	GO:0006508	proteolysis
		cellular_component	GO:0005840	ribosome
		cellular_component	GO:0022625	cytosolic large ribosomal subunit
		cellular_component	GO:0005622	intracellular
		molecular_function	GO:0003735	structural constituent of ribosome
		molecular_function	GO:0004185	serine-type carboxypeptidase activity
csaPP2A	Csa5G608520	biological_process	GO:0008150	biological_process
		biological_process	GO:0016049	cell growth
		biological_process	GO:0034047	regulation of protein phosphatase type 2A activity
		biological_process	GO:0042325	regulation of phosphorylation
		biological_process	GO:0048193	Golgi vesicle transport
		biological_process	GO:0000902	cell morphogenesis
		biological_process	GO:0015743	malate transport
		biological_process	GO:0010119	regulation of stomatal movement
		biological_process	GO:0009723	response to ethylene
		biological_process	GO:0035304	regulation of protein dephosphorylation
		biological_process	GO:0009789	positive regulation of abscisic acid-activated signaling pathway
		biological_process	GO:0009926	auxin polar transport
		cellular_component	GO:0005618	cell wall
		cellular_component	GO:0005634	nucleus
		cellular_component	GO:0005575	cellular_component
		cellular_component	GO:0005829	cytosol
		cellular_component	GO:0005886	plasma membrane
		molecular_function	GO:0003674	molecular_function
		molecular_function	GO:0005488	binding
		molecular_function	GO:0005515	protein binding
		molecular_function	GO:0019888	protein phosphatase regulator activity
csaUBC	Csa3G358610	biological_process	GO:0042023	DNA endoreduplication
		biological_process	GO:0051510	regulation of unidimensional cell growth
		biological_process	GO:0018108	peptidyl-tyrosine phosphorylation
		biological_process	GO:0007169	transmembrane receptor protein tyrosine kinase signaling pathway
		biological_process	GO:0006635	fatty acid beta-oxidation
		biological_process	GO:0009407	toxin catabolic process
		biological_process	GO:0051788	response to misfolded protein
		biological_process	GO:0016567	protein ubiquitination
		biological_process	GO:0043248	proteasome assembly
		biological_process	GO:0016558	protein import into peroxisome matrix
		biological_process	GO:0043161	proteasome-mediated ubiquitin-dependent protein catabolic process
		biological_process	GO:0080129	proteasome core complex assembly
		biological_process	GO:0006301	postreplication repair
		biological_process	GO:0010286	heat acclimation
		biological_process	GO:0048193	Golgi vesicle transport
		biological_process	GO:0008150	biological_process
		cellular_component	GO:0016021	integral component of membrane
		cellular_component	GO:0005886	plasma membrane
		cellular_component	GO:0005575	cellular_component
		cellular_component	GO:0005622	intracellular
		molecular_function	GO:0003674	molecular_function
		molecular_function	GO:0005524	ATP binding
		molecular_function	GO:0004842	ubiquitin-protein transferase activity
		molecular_function	GO:0016874	ligase activity
		molecular_function	GO:0005515	protein binding
		molecular_function	GO:0004714	transmembrane receptor protein tyrosine kinase activity
csaARF	Csa5G524710	biological_process	GO:0006886	intracellular protein transport
		biological_process	GO:0006499	N-terminal protein myristoylation
		biological_process	GO:0043085	positive regulation of catalytic activity
		biological_process	GO:0007264	small GTPase mediated signal transduction
		biological_process	GO:0008150	biological_process
		biological_process	GO:0016192	vesicle-mediated transport
		cellular_component	GO:0005794	Golgi apparatus
		cellular_component	GO:0005622	intracellular
		molecular_function	GO:0005525	GTP binding
		molecular_function	GO:0016787	hydrolase activity
		molecular_function	GO:0016004	phospholipase activator activity
		molecular_function	GO:0005215	transporter activity
csaLEA26	Csa2G151040	biological_process	GO:0016049	cell growth
		biological_process	GO:0000902	cell morphogenesis
		biological_process	GO:0019344	cysteine biosynthetic process
		biological_process	GO:0006094	gluconeogenesis
		biological_process	GO:0006096	glycolytic process
		biological_process	GO:0048193	Golgi vesicle transport
		biological_process	GO:0009735	response to cytokinin
		biological_process	GO:0009269	response to desiccation
		biological_process	GO:0009651	response to salt stress
		cellular_component	GO:0005829	cytosol
		cellular_component	GO:0005794	Golgi apparatus
		cellular_component	GO:0005886	plasma membrane
		cellular_component	GO:0009506	plasmodesma
		cellular_component	GO:0005575	cellular_component
		molecular_function	GO:0003674	molecular_function
csa40SRPS8	Csa6G382970	biological_process	GO:0042254	ribosome biogenesis
		biological_process	GO:0006412	translation
		cellular_component	GO:0005840	ribosome
		cellular_component	GO:0005622	intracellular
		molecular_function	GO:0003735	structural constituent of ribosome
cmoACT	CmoCh07G008070	biological_process	GO:0008152	metabolic process
		biological_process	GO:0008150	biological_process
		cellular_component	GO:0005575	cellular_component
		molecular_function	GO:0005524	ATP binding
		molecular_function	GO:0004386	helicase activity
		molecular_function	GO:0003674	molecular_function
cmoCYP	CmoCh19G007340	biological_process	GO:0006457	protein folding
		biological_process	GO:0000413	protein peptidyl-prolyl isomerization
		cellular_component	GO:0005575	cellular_component
		cellular_component	GO:0005737	cytoplasm
		cellular_component	GO:0005768	endosome
		cellular_component	GO:0005802	trans-Golgi network
		molecular_function	GO:0003755	peptidyl-prolyl cis-trans isomerase activity
		molecular_function	GO:0042277	peptide binding
cmoCACS	CmoCh02G016480	biological_process	GO:0009058	biosynthetic process
		biological_process	GO:0008150	biological_process
		biological_process	GO:0010103	stomatal complex morphogenesis
		biological_process	GO:0006098	pentose-phosphate shunt
		biological_process	GO:0019288	isopentenyl diphosphate biosynthetic process, methylerythritol 4-phosphate pathway
		biological_process	GO:0022900	electron transport chain
		biological_process	GO:0009688	abscisic acid biosynthetic process
		biological_process	GO:0016192	vesicle-mediated transport
		biological_process	GO:0006897	endocytosis
		biological_process	GO:0006810	transport
		biological_process	GO:0006886	intracellular protein transport
		cellular_component	GO:0005829	cytosol
		cellular_component	GO:0005886	plasma membrane
		cellular_component	GO:0030131	clathrin adaptor complex
		cellular_component	GO:0009507	chloroplast
		cellular_component	GO:0005575	cellular_component
		molecular_function	GO:0030170	pyridoxal phosphate binding
		molecular_function	GO:0051536	iron-sulfur cluster binding
		molecular_function	GO:0009055	electron carrier activity
		molecular_function	GO:0003674	molecular_function
		molecular_function	GO:0003824	catalytic activity
		molecular_function	GO:0051537	2 iron, 2 sulfur cluster binding
		molecular_function	GO:0046872	metal ion binding
cmoTUA	CmoCh16G003240	biological_process	GO:0008152	metabolic process
		biological_process	GO:0007017	microtubule-based process
		biological_process	GO:0051258	protein polymerization
		biological_process	GO:0007010	cytoskeleton organization
		cellular_component	GO:0005737	cytoplasm
		cellular_component	GO:0005874	microtubule
		molecular_function	GO:0003924	GTPase activity
		molecular_function	GO:0005525	GTP binding
		molecular_function	GO:0005200	structural constituent of cytoskeleton
cmoTIP41	CmoCh11G013980	biological_process	GO:0008150	biological_process
		cellular_component	GO:0005829	cytosol
		cellular_component	GO:0005575	cellular_component
		molecular_function	GO:0003674	molecular_function
cmoF-BOX	CmoCh15G002280	biological_process	GO:0008152	metabolic process
		biological_process	GO:0008150	biological_process
		cellular_component	GO:0005575	cellular_component
		molecular_function	GO:0016874	ligase activity
		molecular_function	GO:0005515	protein binding
		molecular_function	GO:0003674	molecular_function
cmoPRL36Aa	CmoCh04G029520	biological_process	GO:0008152	metabolic process
		biological_process	GO:0008150	biological_process
		cellular_component	GO:0005575	cellular_component
		molecular_function	GO:0016874	ligase activity
		molecular_function	GO:0005515	protein binding
		molecular_function	GO:0003674	molecular_function
cmoPP2A	CmoCh18G010470	biological_process	GO:0008150	biological_process
		biological_process	GO:0016049	cell growth
		biological_process	GO:0000902	cell morphogenesis
		biological_process	GO:0048193	Golgi vesicle transport
		biological_process	GO:0042325	regulation of phosphorylation
		biological_process	GO:0034047	regulation of protein phosphatase type 2A activity
		cellular_component	GO:0005575	cellular_component
		cellular_component	GO:0005829	cytosol
		cellular_component	GO:0005886	plasma membrane
		molecular_function	GO:0005515	protein binding
		molecular_function	GO:0019888	protein phosphatase regulator activity
		molecular_function	GO:0005488	binding
cmoUBC	CmoCh16G000840	biological_process	GO:0018108	peptidyl-tyrosine phosphorylation
		biological_process	GO:0006511	ubiquitin-dependent protein catabolic process
		biological_process	GO:0006635	fatty acid beta-oxidation
		biological_process	GO:0042023	DNA endoreduplication
		biological_process	GO:0007169	transmembrane receptor protein tyrosine kinase signaling pathway
		biological_process	GO:0000165	MAPK cascade
		biological_process	GO:0006301	postreplication repair
		biological_process	GO:0080129	proteasome core complex assembly
		biological_process	GO:0016567	protein ubiquitination
		biological_process	GO:0010286	heat acclimation
		biological_process	GO:0043161	proteasome-mediated ubiquitin-dependent protein catabolic process
		biological_process	GO:0016558	protein import into peroxisome matrix
		biological_process	GO:0006468	protein phosphorylation
		biological_process	GO:0051510	regulation of unidimensional cell growth
		biological_process	GO:0051788	response to misfolded protein
		biological_process	GO:0009407	toxin catabolic process
		biological_process	GO:0048193	Golgi vesicle transport
		cellular_component	GO:0005622	intracellular
		cellular_component	GO:0005886	plasma membrane
		cellular_component	GO:0005575	cellular_component
		cellular_component	GO:0016021	integral component of membrane
		molecular_function	GO:0004842	ubiquitin-protein transferase activity
		molecular_function	GO:0016874	ligase activity
		molecular_function	GO:0004672	protein kinase activity
		molecular_function	GO:0004714	transmembrane receptor protein tyrosine kinase activity
		molecular_function	GO:0005515	protein binding
		molecular_function	GO:0005524	ATP binding
		molecular_function	GO:0004871	signal transducer activity
cmoLEA26	CmoCh04G020870	biological_process	GO:0016049	cell growth
		biological_process	GO:0000902	cell morphogenesis
		biological_process	GO:0019344	cysteine biosynthetic process
		biological_process	GO:0006094	gluconeogenesis
		biological_process	GO:0006096	glycolytic process
		biological_process	GO:0048193	Golgi vesicle transport
		biological_process	GO:0009735	response to cytokinin
		biological_process	GO:0009269	response to desiccation
		biological_process	GO:0009651	response to salt stress
		cellular_component	GO:0005829	cytosol
		cellular_component	GO:0005794	Golgi apparatus
		cellular_component	GO:0005886	plasma membrane
		cellular_component	GO:0009506	plasmodesma
		cellular_component	GO:0005575	cellular_component
		molecular_function	GO:0003674	molecular_function
cmoARF	CmoCh05G000180	biological_process	GO:0006886	intracellular protein transport
		biological_process	GO:0006471	protein ADP-ribosylation
		biological_process	GO:0016926	protein desumoylation
		biological_process	GO:0046854	phosphatidylinositol phosphorylation
		biological_process	GO:0048015	phosphatidylinositol-mediated signaling
		biological_process	GO:0055046	microgametogenesis
		biological_process	GO:0032957	inositol trisphosphate metabolic process
		biological_process	GO:0046855	inositol phosphate dephosphorylation
		biological_process	GO:0050665	hydrogen peroxide biosynthetic process
		biological_process	GO:0006897	endocytosis
		biological_process	GO:0010228	vegetative to reproductive phase transition of meristem
		biological_process	GO:0006499	N-terminal protein myristoylation
		biological_process	GO:0016192	vesicle-mediated transport
		biological_process	GO:0006487	protein N-linked glycosylation
		biological_process	GO:0009651	response to salt stress
		biological_process	GO:0008150	biological_process
		biological_process	GO:0007264	small GTPase mediated signal transduction
		biological_process	GO:0046686	response to cadmium ion
		biological_process	GO:0043085	positive regulation of catalytic activity
		cellular_component	GO:0005622	intracellular
		cellular_component	GO:0016021	integral component of membrane
		cellular_component	GO:0005774	vacuolar membrane
		cellular_component	GO:0005886	plasma membrane
		cellular_component	GO:0005794	Golgi apparatus
		cellular_component	GO:0005829	cytosol
		cellular_component	GO:0009536	plastid
		molecular_function	GO:0005524	ATP binding
		molecular_function	GO:0016301	kinase activity
		molecular_function	GO:0016773	phosphotransferase activity, alcohol group as acceptor
		molecular_function	GO:0016787	hydrolase activity
		molecular_function	GO:0005215	transporter activity
		molecular_function	GO:0016004	phospholipase activator activity
		molecular_function	GO:0005525	GTP binding
		molecular_function	GO:0005507	copper ion binding
		molecular_function	GO:0005515	protein binding
cmo40SRPS8	CmoCh15G006760	biological_process	GO:0042254	ribosome biogenesis
		biological_process	GO:0006412	translation
		cellular_component	GO:0005840	ribosome
		cellular_component	GO:0005622	intracellular
		molecular_function	GO:0003735	structural constituent of ribosome
